# Supplementary material
Source: PubMed Central journal article supplement (PMC3035715)
Supplement: mmc1.pdf [file mmc1.pdf]

## **Supplemental Data**

### **Mutations in Prickle Orthologs**

#### **Cause Seizures in Flies, Mice, and Humans**

**Hirota** Tao, J. Robert Manak, Levi Sowers, Xue Mei, Hiroshi Kiyonari, Takaya Abe, Nader S. Dahdaleh, Tian Yang, Shu Wu, Shan Chen, Mark H. Fox, Christina Gurnett, Thomas Montine, Thomas Bird, Lisa G. Shaffer, Jill A. Rosenfeld, Juliann McConnell, Suneeta Madan-Khetarpal, Elizabeth Berry-Kravis, Hilary Griesbach, Russell P. Saneto, Matthew P. Scott, Dragana Antic, Jordan Reed, Riley Boland, Salleh N. Ehaideb, Hatem El-Shanti, Vinit B. Mahajan, Polly J. Ferguson, Jeffrey D. Axelrod, Anna-Elina Lehesjoki, Bernd Fritsch, Diane C. Slusarski, John Wemmie, Naoto Ueno, and Alexander G. Bassuk

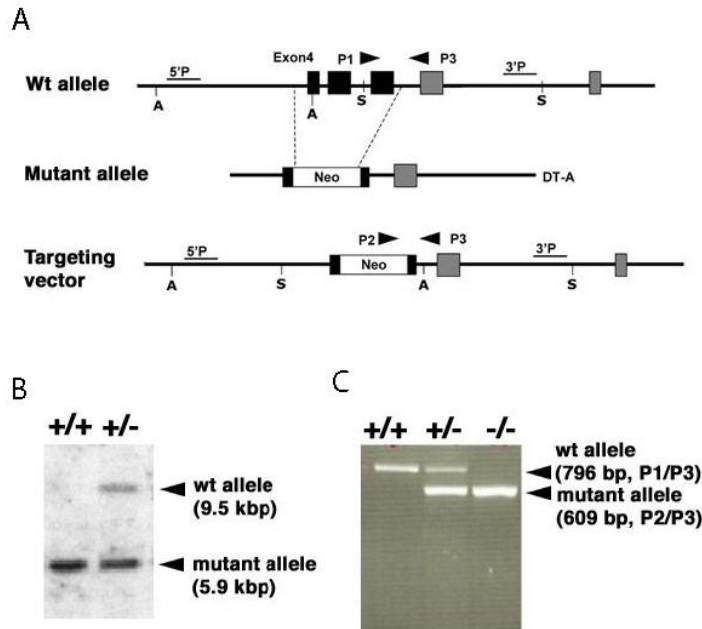

Supplementary Figure 1

**Figure S1. Targeted disruption of the mouse *prickle2* (*mpk2*) gene.** (PDF, 40 KB) (A)

Schematic representation of the targeted disruption. Restriction map of the *mpk2* locus (top), the targeting vector (middle), and the mutation-containing locus following homologous recombination (bottom). (A), Alw44I; S, SacI. (B) Southern blot analysis of targeted ES clones. Genomic DNA from control TT2 ES cells and homologous targeted clones (#134) was digested with SacI and probed with an external probe (5'P). The wild-type (+) and *mpk2* mutant (-) loci generated 9.5 kb and 5.9 kb fragments, respectively. (C) PCR analysis. Genotypes of embryos were determined by PCR, using primers P1, P2, and P3 as described in Materials and Methods.

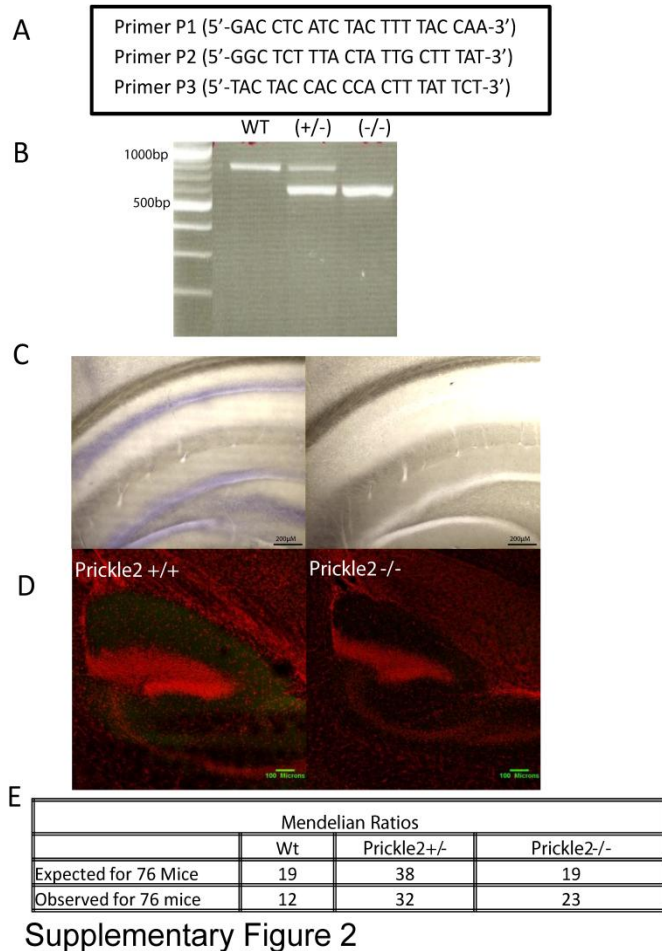

**Figure S2. Genotyping of *Prickle2* mice and proof of knockout.** (PDF, 304KB). **(A)** Primers used for genotyping of *Prickle2* mice. **(B)** Representative PCR gel of wt, *Prickle2*<sup>(+/-)</sup>, and *Prickle2*<sup>(-/-)</sup> mice. **(C)** In-situ of a wt cortex and *Prickle2*<sup>(-/-)</sup> cortex. Prickle2 is widely expressed in the wt cortex. As expected, there is a complete loss of signal in the *Prickle2*<sup>(-/-)</sup> mouse. **(D)** Green=Prickle2, Red=FarRed DNA stain. **(E)** Expected versus observed genotypes from *Prickle2*<sup>(+/-)</sup> X *Prickle2*<sup>(+/-)</sup> matings did not deviate significantly from expected Mendelian ratios.

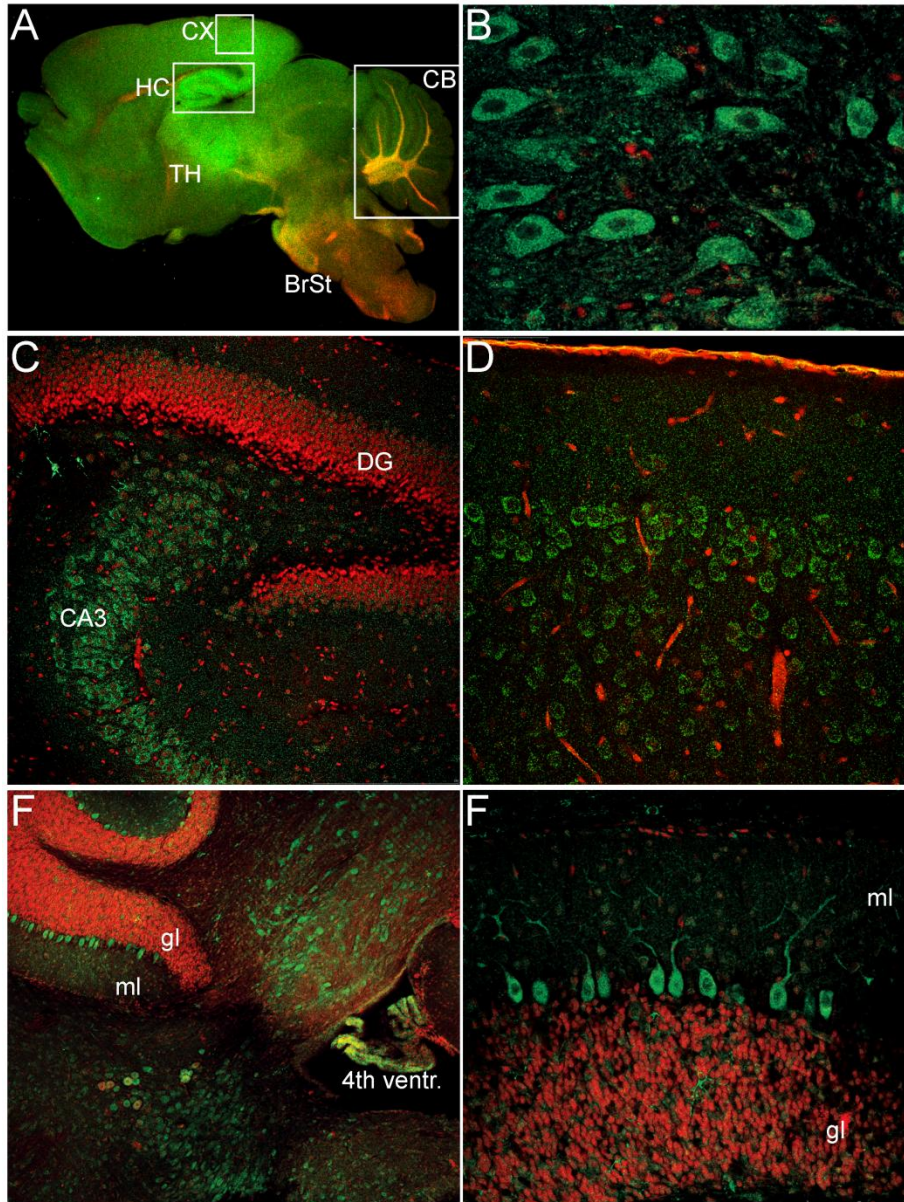

Supplementary Figure 3

**Figure S3. Expression of Prickle2 in P19 mouse brain (JPEG, 3.6MB).** Prickle2 (Green), 7AAD (red). (A) Prickle2 (green) in P19 mouse brain - image taken with fluorescent dissecting scope. Boxed areas show hippocampus (HC); cortex (CX); and cerebellum (CB). Thalamus (TH) and brain stem (BrSt) are labeled. Boxed areas in A are shown in panels (B - F) which represent confocal images where Prickle2 is green and 7AAD DNA, staining nuclei of cells, is

red. B. Prickle2 in neurons of the brain stem; (C) Hippocampus - dentate gyrus (DG) and CA3 regions are shown; (D) Cortex, (E) and (F). Cerebellum - Prickle2 is expressed in Purkinje neurons.

**Table S1. Prickle Resequencing Primers**

|          | Primer Sequence                 |
|----------|---------------------------------|
| EXON 1A  | F CAG ATG CCG TGA CTG ACT TG    |
|          | R GGG AAT TCA CCA AGC AAG AG    |
| EXON 1B  | F GGA AGG CGA TCT GAG CAC T     |
|          | R TCT GGC TTT CTC ATC CTC CT    |
| EXON 2   | F CCA TTG CCA AGG AAT GTG TT    |
|          | R CTG GAA TGA GGA AGG ACC AG    |
| EXON 3   | F TAC ATC CTG CTG GGG GAA T     |
|          | R TTC TTC GGC TAC CTC ATT GG    |
| EXON 4   | F TCA GAG TCA TGG GCT TCA GA    |
|          | R TGG ATG AAT GAA TGG GTG AA    |
| EXON 5   | F CCA GCT AAT GGT GGT TGT CC    |
|          | R GTG CAG AAA GCC AGA AGA CC    |
| EXON 6   | F GGA CCC CAT AGC TTT CTT CC    |
|          | R GGG TTT CTA ACA CTT GCA ATC A |
| EXON 7 A | F TGG AAT CCT GAG ACA AAC CA    |
|          | R CCG TCT TGC CCT TGT TCT T     |
| EXON 7 B | F GAA GAC CCC AAT GGT TCT GA    |
|          | R CTT GCC CTC CTG GAC TGT AG    |
| EXON 7 C | F ATG GGA ACA AGA TGG AGC AG    |
|          | R TAT TTG GGG ACT TGG ATG CT    |
| EXON 7 D | F ATC AAG GAA TGC CGA GAA GA    |
|          | R CCC AGA GAC TAC CCC CTT TC    |
| EXON 8 A | F GAT GAC CAG CAG TGA CAG TGA   |
|          | R CCC TCC ATC AAA ATC AAA GC    |
| EXON 8 B | F CCA GCA GTA CCA GGA GAT GG    |
|          | R TGG CGC ATA AAT TGG TCA TA    |
| EXON 8 C | F GCC ATC TCC CGG TTA AAA GA    |
|          | R GGC CGT AGG AGC TGT ATT TG    |
| EXON 8 D | F TGA CAA CGA GGG CTA TTT CC    |
|          | R TTC CCT TTT CTC CCC CAT AA    |

**Table S2.**

| Subject No. | Sex | Age at study/Onset of symptoms | Family member(s) with homozygous <i>CSTB</i> mutation | Myoclonic jerks at onset                                                  | Present myoclonic jerks                                          | Clinical examination                        | EEG                            | Medication/day     |
|-------------|-----|--------------------------------|-------------------------------------------------------|---------------------------------------------------------------------------|------------------------------------------------------------------|---------------------------------------------|--------------------------------|--------------------|
| 1           | F   | 32/12                          | 3 brothers                                            | During sleep<br>Frequent feeling of cramp in fingers and toes             | None<br>Occasional feeling of cramp in fingers and toes          | Normal                                      | Polyspike- and wave discharges | Lamotrigine 500 mg |
| 2           | M   | 18/15                          | 1 brother                                             | During sleep                                                              | None                                                             | Normal                                      | Normal                         | None               |
| 3           | F   | 36/31                          | 3 siblings                                            | Infrequent focal or generalized jerks                                     | Infrequent focal or generalized jerks                            | Left eye strabismus                         | Normal                         | None               |
| 4           | M   | 18/10                          | 1 sister                                              | Frequent nodding of the head                                              | None                                                             | Normal                                      | Normal                         | None               |
| 5           | M   | 22/18                          | 1 uncle                                               | Infrequent focal or multifocal jerks in hands and legs                    | Action-related tremor and jerks in hands                         | Slight tremor and infrequent jerks in hands | Normal                         | None               |
| 6           | M   | 42/ ?                          | 1 daughter                                            | Infrequent myoclonic jerks in hands and legs and shaking attacks at night | Infrequent myoclonic jerks in hands and shaking attacks at night | Normal                                      | Not done                       | None               |

Clinical features in individuals heterozygous for the minisatellite expansion mutation in *CSTB*. Data collected by Drs. Anna-Elina Lehesjoki and Teija Silén, Helsinki, Finland.
